# Supplementary material for: Prior Antibiotic Use Increases Risk of Urinary Tract Infections Caused by Resistant Escherichia coli among Elderly in Primary Care: A Case-Control Study
Source: MDPI journal article supplement (doi:10.3390/antibiotics11101382), 2022-10-09
Supplement: s1 [file s1]

**Supplementary Table S1: Infectious disease related ICD10 codes**

DA39: Infections with meningococci

DA40: Sepsis caused by streptococci

DA41: Sepsis, other

DA49: Bacterial infection, without specification of location

DB35: Skin fungus

DB36: Other superficial fungi infection

DB37: Infection caused by candida albicans

DB38: Coccidioidomycosis

DB39: Histoplasmosis

DB40: Blastomycosis

DB42: Sporotrichosis

DB44: Aspergillosis

DB45: Kryptococcosis

DB46: Zygomycosis

DB48: Mycosis, other

DB49: non-specified mycosis

DG00: Bacterial meningitis

DG01: Meningitis in bacterial infections classified otherwise

DG06: Intra cranial and intra spinal abscesses and granulomas

DH65: Otitis media, non-purulent  
DH66: Otitis media, purulent  
DH67: Otitis media, classified otherwise  
DJ00: Common cold  
DJ01: Sinuitis  
DJ02: Pharyngitis  
DJ03: Sore throat  
DJ04: Acute laryngitis  
DJ05: Pseudocroup and acute epiglottitis  
DJ06: acute laryngo-pharyngitis  
DJ09: Influenza  
DJ10: Influenza  
DJ11: Influenza  
DJ12: Pneumonia, viral  
DJ13: Pneumonia, pneumococcus  
DJ14: Pneumonia, Haemophilus  
DJ15: Pneumonia, other bacterial  
DJ16: Pneumonia, other infectious agent  
DJ17: Pneumonia, classified otherwise  
DJ18: Influenza  
DJ36: Abscess, thorax

DJ40: Bronchitis

DJ41: Bronchitis, chronic

DJ42: Bronchitis, chronic otherwise classified

DJ44: Chronic obstructive pulmonary disease

DL00: Dermatitis, caused by staphylococcus

DL01: Impetigo

DL02: Abscess, skin

DL03: Phlegmone

DL04: Acute lymphadenitis

DL05: Pilonidal cyst

DL08: Infection located to the skin and subcutaneous tissue

DN30: Cystitis

DN34: Urinary tract infection

DN42: Other disease relation to the prostate

DN45: Epididymitis

DN49: Other infections related to male reproductive organs

DN70: Infection in uterine tube and ovaries

DN71: Uterine infections, except cervicitis

DN72: Cervicitis

DN73: Other form of infection related to female reproductive organs

DN75: Disease in Bartholin's gland

DN76: Infections in vagina and the outer female reproductive organs

DN77: Wounds and infections the outer female reproductive organs

**Supplementary Table S2: Unadjusted analyses results**

|                                                              | Mecillinam |             | Trimethoprim |             | Nitrofurantoin |             | Multiresistance |              |
|--------------------------------------------------------------|------------|-------------|--------------|-------------|----------------|-------------|-----------------|--------------|
| Exposure                                                     | c_OR*      | CI95%**     | c_OR         | CI95%       | C_OR           | CI95%       | c_OR            | CI95%        |
| Number of prescriptions                                      |            |             |              |             |                |             |                 |              |
| 0                                                            |            |             |              |             |                |             |                 |              |
| 1                                                            | 1.37       | (1.19;1.58) | 1.41         | (1.32;1.51) | 1.29           | (1.01;1.66) | 1.40            | (0.62;3.19)  |
| 2                                                            | 1.91       | (1.68;2.18) | 1.67         | (1.57;1.78) | 2.16           | (1.74;2.69) | 2.93            | (1.50;5.72)  |
| ≥3                                                           | 2.73       | (2.42;3.08) | 3.12         | (2.93;3.32) | 4.73           | (3.93;5.69) | 12.08           | (6.93;21.06) |
| Number of DDD                                                |            |             |              |             |                |             |                 |              |
| 0                                                            |            |             |              |             |                |             |                 |              |
| >0-33.3 percentile***                                        | 1.62       | (1.44;1.82) | 1.55         | (1.47;1.63) | 1.88           | (1.55;2.29) | 1.78            | (0.91;3.50)  |
| 33.3-66.6 percentile                                         | 2.02       | (1.75;2.33) | 2.04         | (1.91;2.19) | 2.69           | (2.15;3.37) | 5.91            | (3.1;11.29)  |
| >66.6 percentile                                             | 2.91       | (2.54;3.33) | 3.24         | (3.02;3.48) | 4.70           | (3.83;5.78) | 14.37           | (7.96;25.95) |
| Time since last prescription                                 |            |             |              |             |                |             |                 |              |
| No exposure                                                  | Ref        |             | Ref          |             |                |             | Ref             |              |
| 8–30 days                                                    | 2.29       | (2.06;2.55) | 2.23         | (2.12;2.35) | 2.95           | (2.48;3.5)  | 6.23            | (3.65;10.64) |
| 31–60 days                                                   | 1.64       | (1.42;1.90) | 1.73         | (1.62;1.86) | 2.61           | (2.08;3.27) | 4.04            | (2.10;7.77)  |
| 61–90 days                                                   | 1.60       | (1.35;1.89) | 1.51         | (1.39;1.63) | 1.87           | (1.40;2.48) | 2.32            | (0.92;5.86)  |
| Exposure to specific drugs within 90 days (Ref: no exposure) |            |             |              |             |                |             |                 |              |
| Phenoxymethylpenicillin or dicloxacillin                     | 2.14       | (1.86;2.45) | 1.21         | (1.11;1.31) | 1.30           | (1.02;1.65) | 1.12            | (0.49;2.57)  |
| Pivmecillinam                                                | 1.75       | (1.58;1.94) | 1.39         | (1.32;1.47) | 1.46           | (1.23;1.74) | 3.55            | (2.30;5.48)  |
| Amoxicillin                                                  | 2.05       | (1.64;2.57) | 1.32         | (1.16;1.50) | 0.85           | (0.50;1.45) | -****           | -            |
| Amoxicillin + β lactamase inhibitor                          | 2.01       | (1.43;2.80) | 1.35         | (1.12;1.64) | 1.54           | (0.88;2.69) | 10.24           | (4.51;23.24) |
| Trimethoprim                                                 | 1.50       | (1.26;1.80) | 6.52         | (5.97;7.13) | 1.10           | (0.73;1.66) | 9.99            | (5.48;18.18) |

|                |      |             |      |             |      |              |      |              |
|----------------|------|-------------|------|-------------|------|--------------|------|--------------|
| Sulfamethizole | 1.27 | (1.08;1.48) | 1.42 | (1.32;1.54) | 1.06 | (0.80;1.4)   | 1.44 | (0.72;2.90)  |
| Nitrofurantoin | 1.65 | (1.40;1.95) | 1.88 | (1.73;2.05) | 8.80 | (7.35;10.52) | 9.92 | (6.07;16.22) |
| Macrolides     | 0.89 | (0.66;1.21) | 1.20 | (1.05;1.37) | 1.05 | (0.69;1.6)   | -    | -            |
| Quinolones     | 1.07 | (0.81;1.42) | 2.22 | (1.98;2.48) | 1.81 | (1.23;2.65)  | 3.26 | (1.23;8.58)  |
| Others         | 1.95 | (1.65;2.30) | 1.59 | (1.45;1.74) | 1.26 | (0.89;1.78)  | 3.34 | (1.76;6.36)  |

\* c\_OR= crude odds ratio

\*\* CI95%= 95% Confidence interval

\*\*\* For the different resistance patterns, the 33,3/66,6 percentiles were as following: mecillinam 10/21.88, trimethoprim 10/21.88, nitrofurantoin 10.5/22.00, multiresistance 10/18

\*\*\*\* no analysis due to low numbers

### Supplementary Table S3: Sensitivity analyses results, adjusted.

|                                     |                       | MECILLINAM |       |      | TRIMETHOPRIM |       |      | NITROFURANTOIN |       |      | MULTIRESISTANCE |       |       |
|-------------------------------------|-----------------------|------------|-------|------|--------------|-------|------|----------------|-------|------|-----------------|-------|-------|
|                                     |                       | OR         | CI95% |      | OR           | CI95% |      | OR             | CI95% |      | OR              | CI95% |       |
| <b>NUMBER OF PRESCRIPTIONS</b>      |                       |            |       |      |              |       |      |                |       |      |                 |       |       |
|                                     | 0                     | Ref        |       |      | Ref          |       |      | Ref            |       |      | Ref             |       |       |
|                                     | 1                     | 1.35       | 1.13  | 1.61 | 1.50         | 1.39  | 1.63 | 1.30           | 0.94  | 1.79 | 1.73            | 0.54  | 5.59  |
|                                     | 2                     | 1.90       | 1.61  | 2.24 | 1.63         | 1.50  | 1.78 | 1.83           | 1.36  | 2.46 | 3.66            | 1.36  | 9.82  |
|                                     | 3+                    | 2.34       | 2.01  | 2.73 | 3.57         | 3.31  | 3.85 | 5.98           | 4.81  | 7.43 | 12.12           | 5.22  | 28.11 |
| <b>NUMBER OF DDD</b>                |                       |            |       |      |              |       |      |                |       |      |                 |       |       |
|                                     | 0                     | Ref        |       |      | Ref          |       |      | Ref            |       |      | Ref             |       |       |
|                                     | >0-33.3 percentile    | 1.61       | 1.39  | 1.86 | 1.63         | 1.52  | 1.75 | 1.94           | 1.52  | 2.49 | 2.07            | 0.77  | 5.58  |
|                                     | >33.3-66.6 percentile | 1.83       | 1.53  | 2.20 | 2.21         | 2.03  | 2.41 | 3.02           | 2.31  | 3.95 | 6.29            | 2.45  | 16.12 |
|                                     | >66.6 percentile      | 2.54       | 2.14  | 3.01 | 3.68         | 3.36  | 4.03 | 5.84           | 4.59  | 7.43 | 14.33           | 6.02  | 34.12 |
| <b>TIME SINCE LAST PRESCRIPTION</b> |                       |            |       |      |              |       |      |                |       |      |                 |       |       |
|                                     | No exposure*          | Ref        |       |      | Ref          |       |      | Ref            |       |      | Ref             |       |       |
|                                     | 8 days–30 days        | 2.10       | 1.83  | 2.40 | 2.39         | 2.24  | 2.55 | 3.42           | 2.76  | 4.23 | 6.62            | 3.02  | 14.49 |
|                                     | >30 days–60 days      | 1.60       | 1.33  | 1.92 | 1.86         | 1.71  | 2.03 | 2.82           | 2.15  | 3.70 | 3.05            | 1.01  | 9.22  |

|                                                 |                  |      |      |      |      |      |      |       |      |       |       |      |       |
|-------------------------------------------------|------------------|------|------|------|------|------|------|-------|------|-------|-------|------|-------|
|                                                 | >60 days–90 days | 1.44 | 1.14 | 1.81 | 1.59 | 1.43 | 1.77 | 1.93  | 1.34 | 2.76  | 3.56  | 1.08 | 11.73 |
|                                                 |                  |      |      |      |      |      |      |       |      |       |       |      |       |
| <b>PHENOXYMETHYLPENICILLIN OR DICLOXACILLIN</b> |                  |      |      |      |      |      |      |       |      |       |       |      |       |
|                                                 | No               | Ref  |      |      | Ref  |      |      | Ref   |      |       | Ref   |      |       |
|                                                 | Yes              | 2.16 | 1.83 | 2.54 | 1.20 | 1.09 | 1.32 | 1.29  | 0.96 | 1.73  | 1.36  | 0.49 | 3.78  |
| <b>PIVMECILLINAM</b>                            |                  |      |      |      |      |      |      |       |      |       |       |      |       |
|                                                 | No               | Ref  |      |      | Ref  |      |      | Ref   |      |       | Ref   |      |       |
|                                                 | Yes              | 1.58 | 1.39 | 1.80 | 1.53 | 1.43 | 1.63 | 1.69  | 1.40 | 2.05  | 4.22  | 2.23 | 7.96  |
| <b>AMOXICILLIN</b>                              |                  |      |      |      |      |      |      |       |      |       |       |      |       |
|                                                 | No               | Ref  |      |      | Ref  |      |      | Ref   |      |       |       |      |       |
|                                                 | Yes              | 1.74 | 1.32 | 2.30 | 1.29 | 1.10 | 1.52 | 0.56  | 0.28 | 1.14  |       |      |       |
| <b>AMOXICILLIN + B LACTAMASE INHIBITOR</b>      |                  |      |      |      |      |      |      |       |      |       |       |      |       |
|                                                 | No               | Ref  |      |      | Ref  |      |      | Ref   |      |       | Ref   |      |       |
|                                                 | Yes              | 1.77 | 1.18 | 2.65 | 1.45 | 1.15 | 1.84 | 1.07  | 0.51 | 2.26  | 5.19  | 1.20 | 22.40 |
| <b>TRIMETHOPRIM</b>                             |                  |      |      |      |      |      |      |       |      |       |       |      |       |
|                                                 | No               | Ref  |      |      | Ref  |      |      | Ref   |      |       | Ref   |      |       |
|                                                 | Yes              | 1.43 | 1.13 | 1.80 | 7.19 | 6.38 | 8.11 | 1.81  | 1.34 | 2.46  | 6.17  | 2.36 | 16.16 |
| <b>SULFAMETHIZOLE</b>                           |                  |      |      |      |      |      |      |       |      |       |       |      |       |
|                                                 | No               | Ref  |      |      | Ref  |      |      | Ref   |      |       | Ref   |      |       |
|                                                 | Yes              | 1.15 | 0.94 | 1.42 | 1.46 | 1.32 | 1.61 | 1.19  | 0.88 | 1.61  | 1.44  | 0.51 | 4.07  |
| <b>NITROFURANTOIN</b>                           |                  |      |      |      |      |      |      |       |      |       |       |      |       |
|                                                 | No               | Ref  |      |      | Ref  |      |      | Ref   |      |       | Ref   |      |       |
|                                                 | Yes              | 1.65 | 1.35 | 2.03 | 2.48 | 2.23 | 2.76 | 11.77 | 9.70 | 14.29 | 13.44 | 6.75 | 26.75 |
| <b>MACROLIDES</b>                               |                  |      |      |      |      |      |      |       |      |       |       |      |       |
|                                                 | No               | Ref  |      |      | Ref  |      |      | Ref   |      |       |       |      |       |
|                                                 | Yes              | 0.80 | 0.55 | 1.17 | 1.21 | 1.03 | 1.42 | 0.75  | 0.40 | 1.42  |       |      |       |
| <b>QUINOLONES</b>                               |                  |      |      |      |      |      |      |       |      |       |       |      |       |
|                                                 | No               | Ref  |      |      | Ref  |      |      | Ref   |      |       | Ref   |      |       |
|                                                 | Yes              | 1.00 | 0.72 | 1.38 | 3.13 | 2.71 | 3.62 | 2.51  | 1.79 | 3.51  | 2.29  | 0.55 | 9.52  |
| <b>OTHERS</b>                                   |                  |      |      |      |      |      |      |       |      |       |       |      |       |
|                                                 | No               | Ref  |      |      | Ref  |      |      | Ref   |      |       | Ref   |      |       |
|                                                 | Yes              | 1.66 | 1.35 | 2.05 | 1.68 | 1.50 | 1.88 | 1.35  | 0.96 | 1.89  | 3.75  | 1.56 | 9.04  |
